# Supplementary material for: Survival and new-onset morbidity after critical care admission for acute pancreatitis in Scotland: a national electronic healthcare record linkage cohort study
Source: PubMed Central journal article supplement (PMC6303604; doi:10.1136/bmjopen-2018-023853), 2018-12-14
Supplement: bmjopen-2018-023853supp001.pdf [file bmjopen-2018-023853supp001.pdf]

## Supplementary data.

**Title:** Survival and new-onset morbidity after critical care admission for acute pancreatitis: a national electronic healthcare record linkage study.

**Authors:** Chiara Ventre, Sian Nowell, Cat Graham, Doug Kidd, Christos Skouras and Damian J. Mole

### Supplementary material includes:

1 table

11 supplementary figures

On 13 pages

**Supplementary Table 1. Categorisation of Causes of Death.** The ICD-10 categories for cause of death were allocated to six groups as shown.

| Category of death                                                      | ICD 10 Code                                                                                                                                                                   |
|------------------------------------------------------------------------|-------------------------------------------------------------------------------------------------------------------------------------------------------------------------------|
| Circulatory/Cardiovascular system                                      | IX Diseases of the circulatory system                                                                                                                                         |
| Digestive/Metabolic System                                             | III Diseases of the blood and blood-forming organs and certain disorders involving the immune mechanism<br><i>D50-D53 Nutritional anaemias</i>                                |
|                                                                        | IV Endocrine, nutritional and metabolic diseases                                                                                                                              |
|                                                                        | XI Diseases of the digestive system                                                                                                                                           |
|                                                                        | XVIII Symptoms, signs and abnormal clinical and laboratory findings, not elsewhere classified<br><i>R10-R19 Symptoms and Signs involving the digestive system and abdomen</i> |
| Neoplasms                                                              | II Neoplasms                                                                                                                                                                  |
| Respiratory System                                                     | X Diseases of the Respiratory System                                                                                                                                          |
| Other                                                                  | I Certain infectious and parasitic diseases                                                                                                                                   |
|                                                                        | III Diseases of the blood and blood-forming organs and certain disorders involving the immune mechanism<br><i>Excluding D50-D53</i>                                           |
|                                                                        | V Mental and behavioural disorders                                                                                                                                            |
|                                                                        | VI Diseases of the nervous system                                                                                                                                             |
|                                                                        | VII Diseases of the eye and adnexa                                                                                                                                            |
|                                                                        | VIII Diseases of the ear and mastoid process                                                                                                                                  |
|                                                                        | XII Diseases of the skin and subcutaneous tissue                                                                                                                              |
|                                                                        | XIII Diseases of the musculoskeletal system and connective tissue                                                                                                             |
|                                                                        | XIV Diseases of the genitourinary system                                                                                                                                      |
|                                                                        | XV Pregnancy, childbirth and the puerperium                                                                                                                                   |
|                                                                        | XVI Certain conditions originating in the perinatal period                                                                                                                    |
|                                                                        | XVII Congenital malformations, deformations and chromosomal abnormalities                                                                                                     |
|                                                                        | XVIII Symptoms, signs and abnormal clinical and laboratory findings, not elsewhere classified<br><i>Excluding R10-R19</i>                                                     |
|                                                                        | XIX Injury, poisoning and certain other consequences of external causes                                                                                                       |
|                                                                        | XX External causes of morbidity and mortality                                                                                                                                 |
| XXI Factors influencing health status and contact with health services |                                                                                                                                                                               |
| XXII Codes for special purposes                                        |                                                                                                                                                                               |

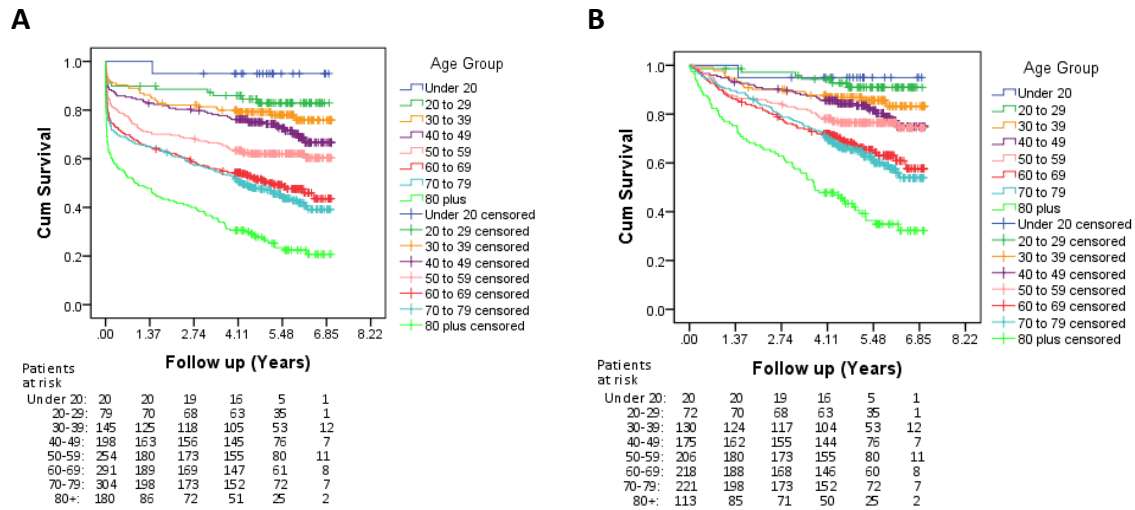

| Pairwise Comparisons – including in hospital deaths |           |            |      |            |      |            |      |            |      |            |      |            |      |            |      |            |      |
|-----------------------------------------------------|-----------|------------|------|------------|------|------------|------|------------|------|------------|------|------------|------|------------|------|------------|------|
|                                                     | Age group | Under 20   |      | 20 to 29   |      | 30 to 39   |      | 40 to 49   |      | 50 to 59   |      | 60 to 69   |      | 70 to 79   |      | 80 plus    |      |
|                                                     |           | Chi-Square | Sig. | Chi-Square | Sig. | Chi-Square | Sig. | Chi-Square | Sig. | Chi-Square | Sig. | Chi-Square | Sig. | Chi-Square | Sig. | Chi-Square | Sig. |
| Log Rank (Mantel-Cox)                               | Under 20  |            |      | 1.614      | .204 | 2.907      | .088 | 4.199      | .040 | 7.380      | .007 | 11.599     | .001 | 13.092     | .000 | 24.091     | .000 |
|                                                     | 20 to 29  | 1.614      | .204 |            |      | .954       | .329 | 3.962      | .047 | 11.683     | .001 | 25.914     | .000 | 32.015     | .000 | 66.499     | .000 |
|                                                     | 30 to 39  | 2.907      | .088 | .954       | .329 |            |      | 1.486      | .223 | 10.898     | .001 | 31.203     | .000 | 40.173     | .000 | 92.223     | .000 |
|                                                     | 40 to 49  | 4.199      | .040 | 3.962      | .047 | 1.486      | .223 |            |      | 5.256      | .022 | 25.194     | .000 | 35.378     | .000 | 92.343     | .000 |
|                                                     | 50 to 59  | 7.380      | .007 | 11.683     | .001 | 10.898     | .001 | 5.256      | .022 |            |      | 8.366      | .004 | 15.589     | .000 | 63.022     | .000 |
|                                                     | 60 to 69  | 11.599     | .001 | 25.914     | .000 | 31.203     | .000 | 25.194     | .000 | 8.366      | .004 |            |      | 1.094      | .296 | 30.182     | .000 |
|                                                     | 70 to 79  | 13.092     | .000 | 32.015     | .000 | 40.173     | .000 | 35.378     | .000 | 15.589     | .000 | 1.094      | .296 |            |      | 21.152     | .000 |
|                                                     | 80 plus   | 24.091     | .000 | 66.499     | .000 | 92.223     | .000 | 92.343     | .000 | 63.022     | .000 | 30.182     | .000 | 21.152     | .000 |            |      |

| Pairwise Comparisons  |           |            |      |            |      |            |      |            |      |            |      |            |      |            |      |            |      |
|-----------------------|-----------|------------|------|------------|------|------------|------|------------|------|------------|------|------------|------|------------|------|------------|------|
|                       | Age group | Under 20   |      | 20 to 29   |      | 30 to 39   |      | 40 to 49   |      | 50 to 59   |      | 60 to 69   |      | 70 to 79   |      | 80 plus    |      |
|                       |           | Chi-Square | Sig. | Chi-Square | Sig. | Chi-Square | Sig. | Chi-Square | Sig. | Chi-Square | Sig. | Chi-Square | Sig. | Chi-Square | Sig. | Chi-Square | Sig. |
| Log Rank (Mantel-Cox) | Under 20  |            |      | .195       | .659 | 1.212      | .271 | 1.981      | .159 | 3.281      | .070 | 5.997      | .014 | 6.718      | .010 | 15.130     | .000 |
|                       | 20 to 29  | .195       | .659 |            |      | 1.730      | .188 | 4.552      | .033 | 7.764      | .005 | 17.852     | .000 | 21.251     | .000 | 49.740     | .000 |
|                       | 30 to 39  | 1.212      | .271 | 1.730      | .188 |            |      | .986       | .321 | 4.151      | .042 | 16.184     | .000 | 20.474     | .000 | 59.844     | .000 |
|                       | 40 to 49  | 1.981      | .159 | 4.552      | .033 | .986       | .321 |            |      | 1.272      | .259 | 12.308     | .000 | 17.081     | .000 | 60.511     | .000 |
|                       | 50 to 59  | 3.281      | .070 | 7.764      | .005 | 4.151      | .042 | 1.272      | .259 |            |      | 5.838      | .016 | 9.458      | .002 | 47.244     | .000 |
|                       | 60 to 69  | 5.997      | .014 | 17.852     | .000 | 16.184     | .000 | 12.308     | .000 | 5.838      | .016 |            |      | .326       | .568 | 22.791     | .000 |
|                       | 70 to 79  | 6.718      | .010 | 21.251     | .000 | 20.474     | .000 | 17.081     | .000 | 9.458      | .002 | .326       | .568 |            |      | 19.713     | .000 |
|                       | 80 plus   | 15.130     | .000 | 49.740     | .000 | 59.844     | .000 | 60.511     | .000 | 47.244     | .000 | 22.791     | .000 | 19.713     | .000 |            |      |

**Supplementary Figure 1. Survival by age.** Kaplan-Meier plots of the proportion of surviving patients over time in years. Patients were categorised by age. Vertical dashes represent right-censored patients. The number of patients remaining at risk at each time point are presented under the chart. Log-rank pair-wise analyses are presented above the corresponding chart **a**. Analyses including in-hospital deaths. **b**. Analyses excluding in-hospital deaths

A

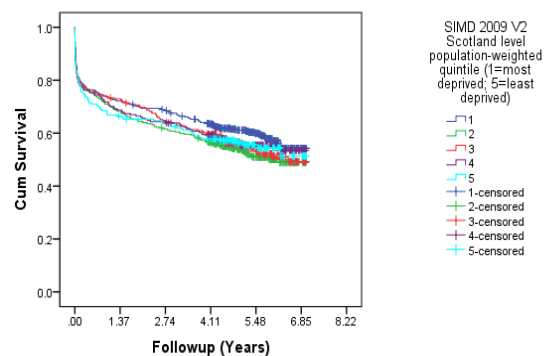

Patients at risk:

|    | 1   | 2   | 3   | 4   | 5   |    |
|----|-----|-----|-----|-----|-----|----|
| 1: | 438 | 316 | 298 | 261 | 134 | 15 |
| 2: | 344 | 235 | 211 | 184 | 93  | 8  |
| 3: | 262 | 190 | 167 | 151 | 75  | 10 |
| 4: | 227 | 156 | 145 | 125 | 57  | 6  |
| 5: | 193 | 127 | 120 | 106 | 46  | 10 |

B

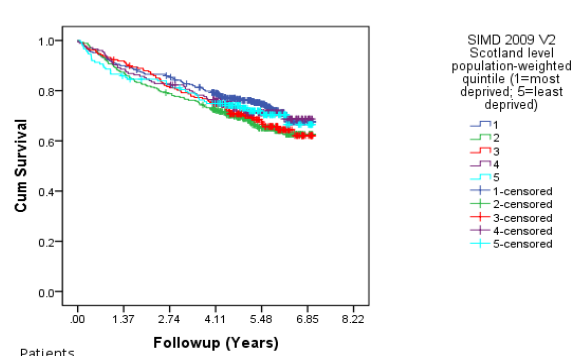

Patients at risk:

|    | 1   | 2   | 3   | 4   | 5   |    |
|----|-----|-----|-----|-----|-----|----|
| 1: | 349 | 314 | 296 | 259 | 133 | 15 |
| 2: | 269 | 235 | 211 | 184 | 92  | 8  |
| 3: | 208 | 190 | 167 | 151 | 75  | 10 |
| 4: | 175 | 155 | 144 | 124 | 57  | 6  |
| 5: | 149 | 127 | 120 | 106 | 45  | 10 |

Pairwise Comparisons – including in hospital deaths

|                                                                                              |   | 1          |      | 2          |      | 3          |      | 4          |      | 5          |      |
|----------------------------------------------------------------------------------------------|---|------------|------|------------|------|------------|------|------------|------|------------|------|
| SIMD 2009 V2 Scotland level population-weighted quintile (1=most deprived; 5=least deprived) |   | Chi-Square | Sig. | Chi-Square | Sig. | Chi-Square | Sig. | Chi-Square | Sig. | Chi-Square | Sig. |
| Log Rank (Mantel-Cox)                                                                        | 1 |            |      | 3.634      | .057 | 1.801      | .180 | .248       | .618 | .456       | .499 |
|                                                                                              | 2 | 3.634      | .057 |            |      | .175       | .676 | 1.207      | .272 | .695       | .405 |
|                                                                                              | 3 | 1.801      | .180 | .175       | .676 |            |      | .447       | .504 | .229       | .632 |
|                                                                                              | 4 | .248       | .618 | 1.207      | .272 | .447       | .504 |            |      | .030       | .864 |
|                                                                                              | 5 | .456       | .499 | .695       | .405 | .229       | .632 | .030       | .864 |            |      |

Pairwise Comparisons – excluding in hospital deaths

|                                                                                                  |   | 1          |      | 2          |      | 3          |      | 4          |      | 5          |      |
|--------------------------------------------------------------------------------------------------|---|------------|------|------------|------|------------|------|------------|------|------------|------|
| SIMD 2009 V2 Scotland level population-weighted quintile (1 = most deprived; 5 = least deprived) |   | Chi-Square | Sig. | Chi-Square | Sig. | Chi-Square | Sig. | Chi-Square | Sig. | Chi-Square | Sig. |
| Log Rank (Mantel-Cox)                                                                            | 1 |            |      | 3.473      | .062 | 1.339      | .247 | .602       | .438 | 1.130      | .288 |
|                                                                                                  | 2 | 3.473      | .062 |            |      | .293       | .588 | .643       | .423 | .205       | .650 |
|                                                                                                  | 3 | 1.339      | .247 | .293       | .588 |            |      | .075       | .784 | .000       | .993 |
|                                                                                                  | 4 | .602       | .438 | .643       | .423 | .075       | .784 |            |      | .075       | .785 |
|                                                                                                  | 5 | 1.130      | .288 | .205       | .650 | .000       | .993 | .075       | .785 |            |      |

**Supplementary Figure 2. Survival by Scottish Index of Multiple Deprivation (SIMD) quintile.** Kaplan-Meier plots of the proportion of surviving patients over time in years. Patients were categorised by SIMD quintile. Vertical dashes represent right-censored patients. The number of patients remaining at risk at each time point are presented under the chart. Log-rank pair-wise analyses are presented above the corresponding chart **a**. Analyses including in-hospital deaths. **b**. Analyses excluding in-hospital deaths

A

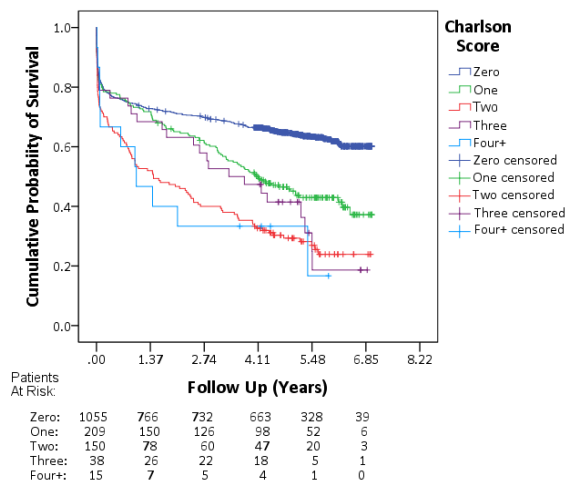

B

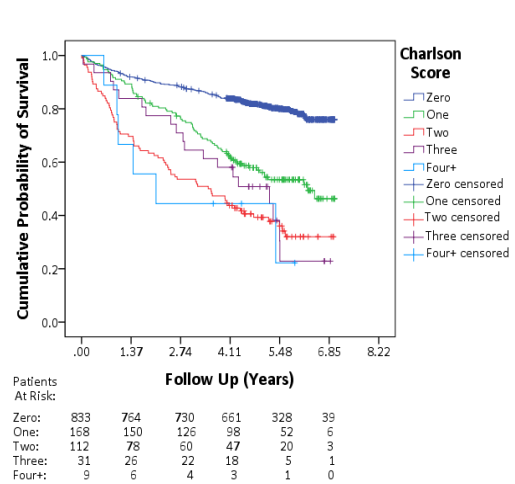

| Pairwise Comparisons – including in-hospital deaths |                |            |      |            |      |            |      |            |      |            |      |
|-----------------------------------------------------|----------------|------------|------|------------|------|------------|------|------------|------|------------|------|
|                                                     | Charlson score | 0          |      | 1          |      | 2          |      | 3          |      | 4+         |      |
|                                                     |                | Chi-Square | Sig. | Chi-Square | Sig. | Chi-Square | Sig. | Chi-Square | Sig. | Chi-Square | Sig. |
| Log Rank (Mantel-Cox)                               | 0              |            |      | 22.485     | .000 | 74.261     | .000 | 12.801     | .000 | 9.426      | .002 |
|                                                     | 1              | 22.485     | .000 |            |      | 13.189     | .000 | 1.166      | .280 | 3.167      | .075 |
|                                                     | 2              | 74.261     | .000 | 13.189     | .000 |            |      | 1.147      | .284 | .038       | .846 |
|                                                     | 3              | 12.801     | .000 | 1.166      | .280 | 1.147      | .284 |            |      | .782       | .376 |
|                                                     | 4+             | 9.426      | .002 | 3.167      | .075 | .038       | .846 | .782       | .376 |            |      |

| Pairwise Comparisons – excluding in hospital deaths |                |            |      |            |      |            |      |            |      |            |      |
|-----------------------------------------------------|----------------|------------|------|------------|------|------------|------|------------|------|------------|------|
|                                                     | Charlson score | 0          |      | 1          |      | 2          |      | 3          |      | 4+         |      |
|                                                     |                | Chi-Square | Sig. | Chi-Square | Sig. | Chi-Square | Sig. | Chi-Square | Sig. | Chi-Square | Sig. |
| Log Rank (Mantel-Cox)                               | 0              |            |      | 52.398     | .000 | 135.915    | .000 | 35.007     | .000 | 19.238     | .000 |
|                                                     | 1              | 52.398     | .000 |            |      | 12.621     | .000 | 2.097      | .148 | 3.383      | .066 |
|                                                     | 2              | 135.915    | .000 | 12.621     | .000 |            |      | .495       | .482 | .067       | .796 |
|                                                     | 3              | 35.007     | .000 | 2.097      | .148 | .495       | .482 |            |      | .441       | .507 |
|                                                     | 4+             | 19.238     | .000 | 3.383      | .066 | .067       | .796 | .441       | .507 |            |      |

**Supplementary Figure 3. Survival by Charlson Score.** Kaplan-Meier plots of the proportion of surviving patients over time in years. Patients were categorised by Charlson score. Vertical dashes represent right-censored patients. The number of patients remaining at risk at each time point are presented under the chart. Log-rank pair-wise analyses are presented above the corresponding chart **a.** Analyses including in-hospital deaths. **b.** Analyses excluding in-hospital deaths

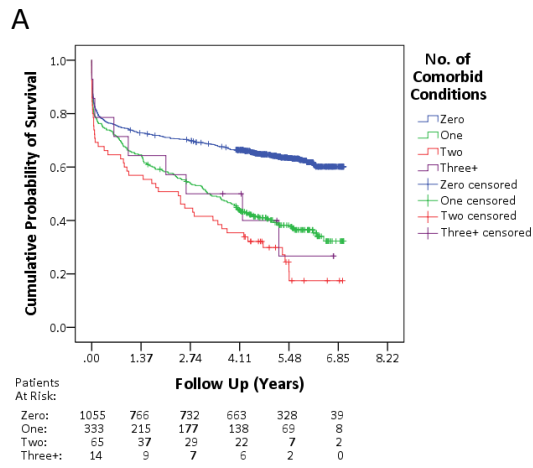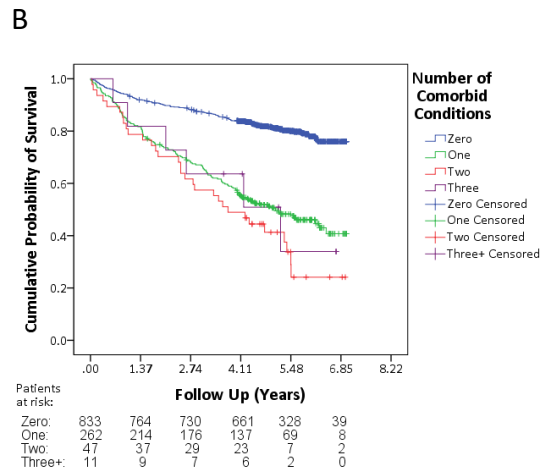

| Pairwise Comparisons – including in hospital deaths |    |            |      |            |      |            |      |            |      |
|-----------------------------------------------------|----|------------|------|------------|------|------------|------|------------|------|
|                                                     |    | 0          |      | 1          |      | 2          |      | 3+         |      |
| Charlson No. of Conditions                          |    | Chi-Square | Sig. | Chi-Square | Sig. | Chi-Square | Sig. | Chi-Square | Sig. |
| Log Rank (Mantel-Cox)                               | 0  |            |      | 57.146     | .000 | 40.233     | .000 | 3.749      | .053 |
|                                                     | 1  | 57.146     | .000 |            |      | 4.247      | .039 | .607       | .436 |
|                                                     | 2  | 40.233     | .000 | 4.247      | .039 |            |      |            |      |
|                                                     | 3+ | 3.749      | .053 | .002       | .968 | .607       | .436 |            |      |

| Pairwise Comparisons – excluding in hospital deaths |     |            |      |            |      |            |      |            |      |
|-----------------------------------------------------|-----|------------|------|------------|------|------------|------|------------|------|
| Charlson No. of Conditions                          |     | .00        |      | 1          |      | 2          |      | 3+         |      |
|                                                     |     | Chi-Square | Sig. | Chi-Square | Sig. | Chi-Square | Sig. | Chi-Square | Sig. |
| Log Rank (Mantel-Cox)                               | .00 |            |      | 113.399    | .000 | 69.509     | .000 | 9.289      | .002 |
|                                                     | 1   | 113.399    | .000 |            |      | 2.654      | .103 | .324       | .569 |
|                                                     | 2   | 69.509     | .000 | 2.654      | .103 |            |      |            |      |
|                                                     | 3+  | 9.289      | .002 | .003       | .954 | .324       | .569 |            |      |

**Supplementary Figure 4. Survival by number of conditions contributing to the Charlson Score.**

Kaplan-Meier plots of the proportion of surviving patients over time in years. Patients were categorised by the number of conditions contributing to their Charlson score. Vertical dashes represent right-censored patients. The number of patients remaining at risk at each time point are presented under the chart. Log-rank pair-wise analyses are presented above the corresponding chart **a.** Analyses including in-hospital deaths. **b.** Analyses excluding in-hospital deaths

**A**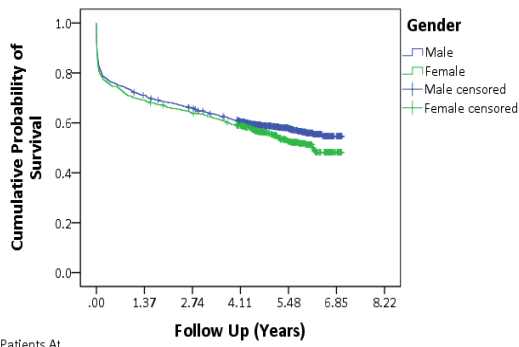

Patients At Risk:

|         |     |     |     |     |     |    |
|---------|-----|-----|-----|-----|-----|----|
| Male:   | 830 | 588 | 542 | 471 | 243 | 27 |
| Female: | 641 | 443 | 407 | 363 | 167 | 22 |

**B**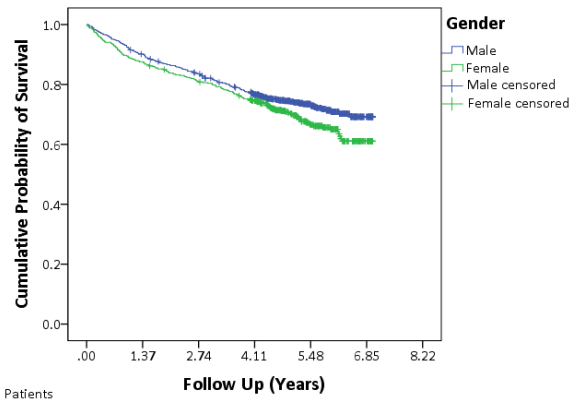

Patients At Risk:

|         |     |     |     |     |     |    |
|---------|-----|-----|-----|-----|-----|----|
| Male:   | 650 | 584 | 538 | 467 | 242 | 27 |
| Female: | 506 | 443 | 407 | 363 | 167 | 22 |

**Supplementary Figure 5. Gender.** Kaplan-Meier plots of the proportion of surviving patients over time in years. Patients were categorised by gender. Vertical dashes represent right-censored patients. The number of patients remaining at risk at each time point are presented under the chart. Log-rank analyses are presented to the right of the corresponding chart **a**. Analyses including in-hospital deaths (Log Rank test,  $P = 0.134$ ). **b**. Analyses excluding in-hospital deaths (Log Rank test,  $P = 0.049$ )

A

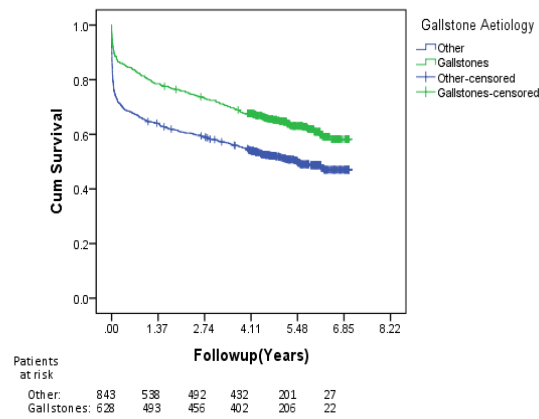

B

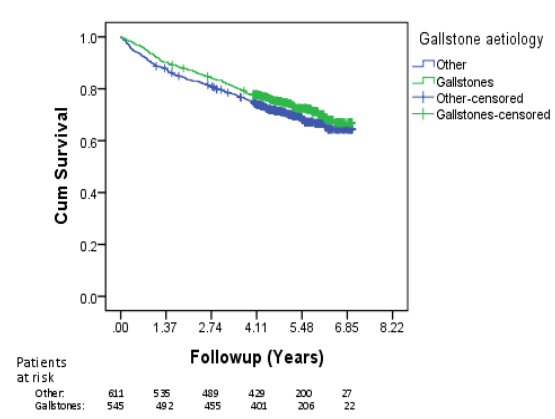

**Supplementary Figure 6. Survival by aetiology of pancreatitis.** Kaplan-Meier plots of the proportion of surviving patients over time in years. Patients were categorised by aetiology – gallstones or other causes. Vertical dashes represent right-censored patients. The number of patients remaining at risk at each time point are presented under the chart. Log-rank analyses are presented to the right of the corresponding chart **a**. Analyses including in-hospital deaths. (Log Rank test, Gallstones vs Other,  $P < 0.001$ ) **b**. Analyses excluding in-hospital deaths (Log Rank test, Gallstones vs Other,  $P = 0.139$ )



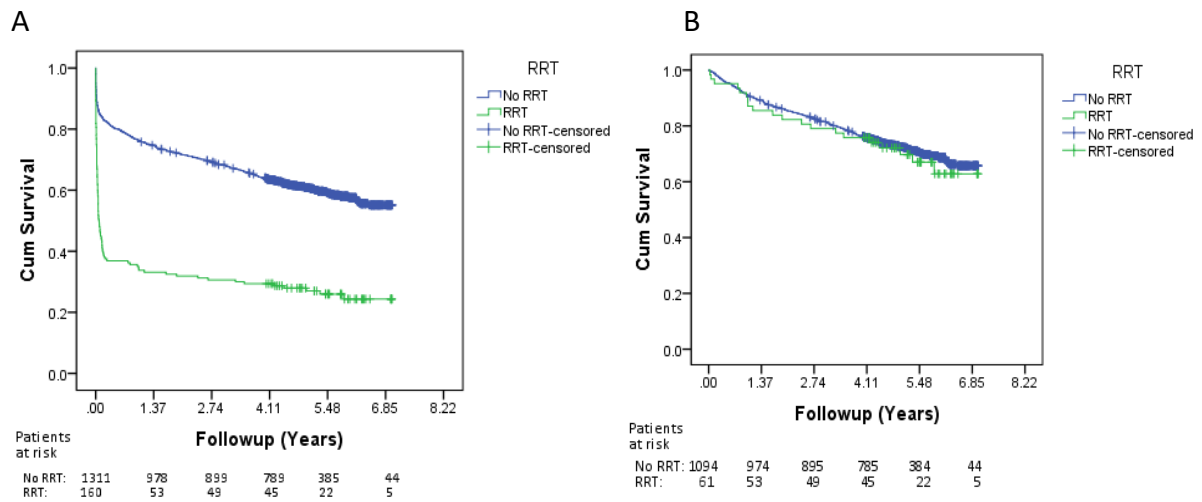

**Supplementary Figure 7. Survival comparing use of renal replacement therapy (RRT).** Kaplan-Meier plots of the proportion of surviving patients over time in years. Patients were categorised by whether they required RRT during the index admission. Vertical dashes represent right-censored patients. The number of patients remaining at risk at each time point are presented under the chart. Log-rank analyses are presented to the right of the corresponding chart **a**. Analyses including in-hospital deaths (Log Rank test RRT vs no RRT,  $P < 0.001$ ). **b**. Analyses excluding in-hospital deaths (Log Rank test RRT vs no RRT,  $P = 0.634$ ).

A

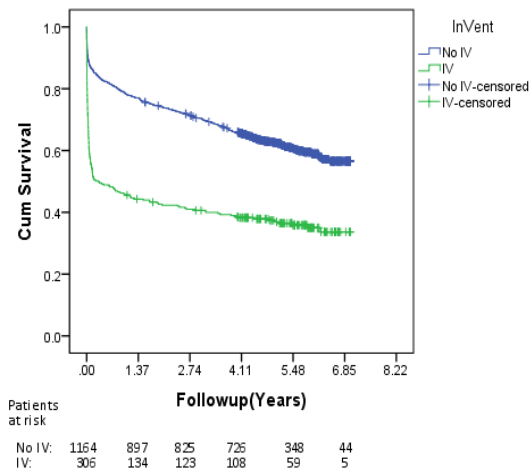

B

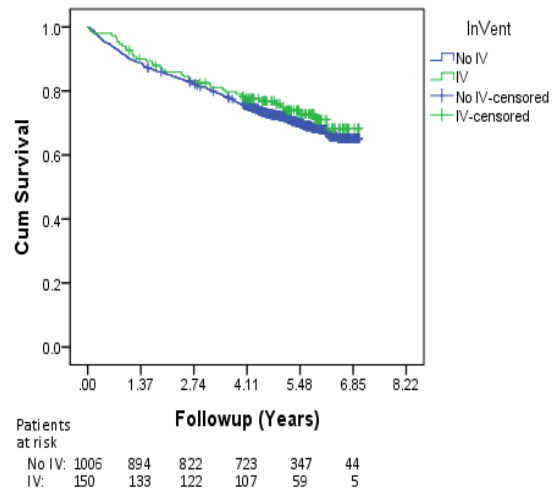

**Supplementary Figure 8. Survival according to use of invasive ventilation.** Kaplan-Meier plots of the proportion of surviving patients over time in years. Patients were categorised by whether they required invasive ventilation during the index admission. Vertical dashes represent right-censored patients. The number of patients remaining at risk at each time point are presented under the chart. Log-rank analyses are presented to the right of the corresponding chart **a**. Analysis including in-hospital deaths (Log Rank test inv. vent vs no inv. vent,  $P < 0.001$ ). **b**. Analysis excluding in-hospital deaths (Log Rank test inv. vent vs no inv. vent,  $P = 0.428$ ).

**A**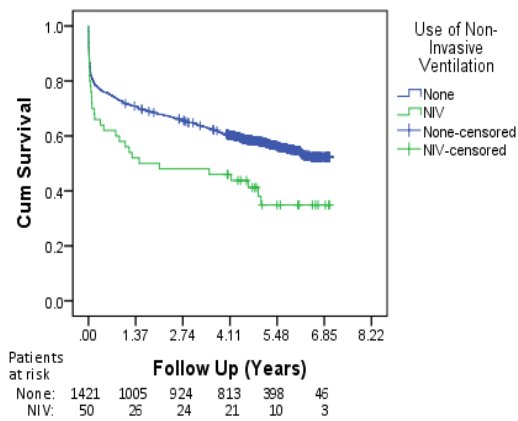**B**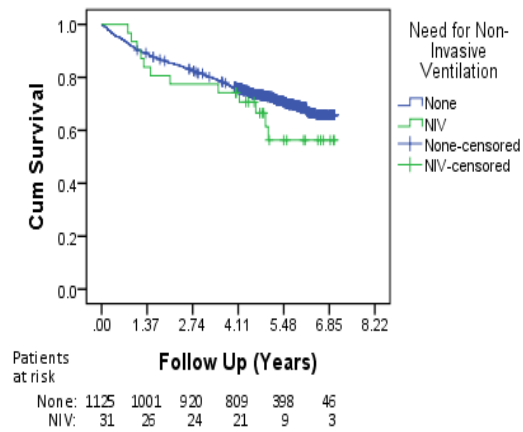

**Supplementary Figure 9. Use of non-invasive ventilation (NIV).** Kaplan-Meier plots of the proportion of surviving patients over time in years. Patients were categorised by whether or not they required NIV during the index admission. Vertical dashes represent right-censored patients. The number of patients remaining at risk at each time point are presented under the chart. Log-rank analyses are presented to the right of the corresponding chart **a**. Analyses including in-hospital deaths (Log Rank test NIV vs no NIV,  $P = 0.008$ ). **b**. Analysis excluding in-hospital deaths (Log Rank test NIV vs no NIV,  $P = 0.301$ )

A

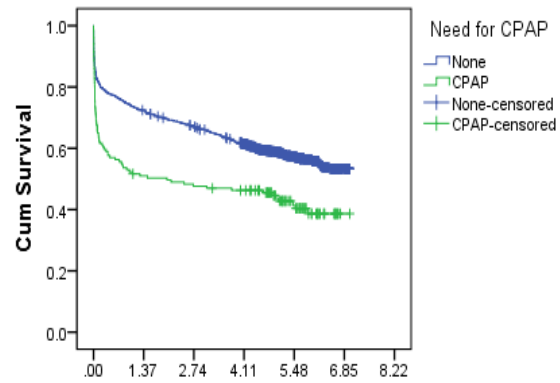

| Patients at risk | Follow Up (Years) |      |      |      |      |      |
|------------------|-------------------|------|------|------|------|------|
|                  | .00               | 1.37 | 2.74 | 4.11 | 5.48 | 6.85 |
| None:            | 1320              | 955  | 877  | 767  | 373  | 48   |
| CPAP:            | 151               | 76   | 71   | 67   | 34   | 1    |

B

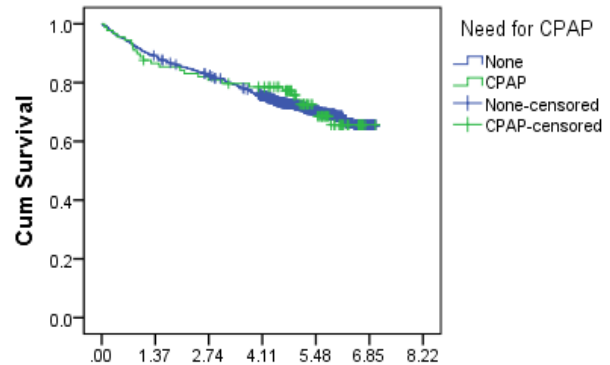

| Patients at risk | Follow Up (Years) |      |      |      |      |      |
|------------------|-------------------|------|------|------|------|------|
|                  | .00               | 1.37 | 2.74 | 4.11 | 5.48 | 6.85 |
| None:            | 1067              | 951  | 873  | 763  | 372  | 48   |
| CPAP:            | 89                | 76   | 71   | 67   | 34   | 1    |

**Supplementary Figure 10. Survival according to use of continuous positive airway pressure (CPAP).**

Kaplan-Meier plots of the proportion of surviving patients over time in years. Patients were categorised by whether they required CPAP during the index admission. Vertical dashes represent right-censored patients. The number of patients remaining at risk at each time point are presented under the chart. Log-rank analyses are presented to the right of the corresponding chart **a**. Analyses including in-hospital deaths (Log Rank test CPAP vs no CPAP,  $P < 0.001$ ). **b**. Analysis excluding in-hospital deaths (Log Rank test CPAP vs no CPAP,  $P = 0.930$ )

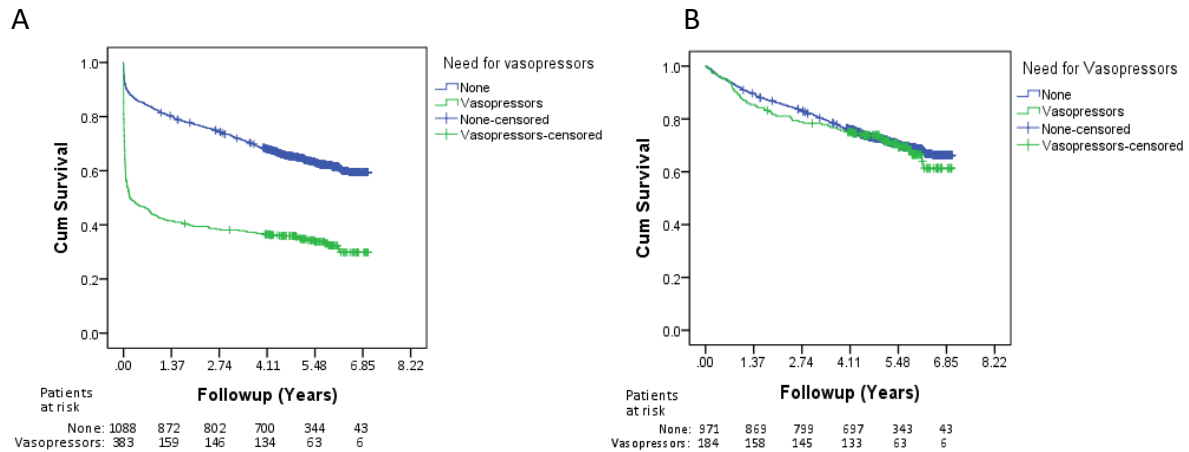

**Supplementary Figure 11. Survival according to use of vasopressors.** Kaplan-Meier plots of the proportion of surviving patients over time in years. Patients were categorised by whether they required vasopressors during the index admission. Vertical dashes represent right-censored patients. The number of patients remaining at risk at each time point are presented under the chart. Log-rank analyses are presented above the corresponding chart **a**. Analyses including in-hospital deaths (Log Rank test Vasopressors vs no Vasopressors,  $P < 0.001$ ). **b**. Analysis excluding in-hospital deaths (Log Rank test Vasopressors vs no Vasopressors,  $P = 0.579$ )
